# Supplementary material for: Why Most Biomedical Findings Echoed by Newspapers Turn Out to be False: The Case of Attention Deficit Hyperactivity Disorder
Source: PLoS One. 2012 Sep 12;7(9):e44275. doi: 10.1371/journal.pone.0044275 (PMC3440402; doi:10.1371/journal.pone.0044275)
Supplement: Table S2 — PubMed search of meta-analyses related to the “top 10” scientific articles. (PDF) [file pone.0044275.s002.pdf]

**Table S2.** PubMed search of meta-analyses related to the "top 10" scientific articles. The Boolean equation was: (ADHD OR attention deficit) AND (specific term). This PubMed search was limited to "human" and "meta-analysis". When several meta-analyses were found, the two most recent were selected. Reference number is indicated in *italic*

| Year<br>1 <sup>st</sup> author | Title                                                                                               | Specific term                             | meta-analysis found                                          |
|--------------------------------|-----------------------------------------------------------------------------------------------------|-------------------------------------------|--------------------------------------------------------------|
| 1990<br>Zametkin               | Cerebral glucose metabolism in adults with hyperactivity of childhood onset                         | cerebral glucose metabolism OR imaging    | No meta-analysis found, but claim refuted by the same group. |
| 1993<br>Hauser                 | Attention deficit-hyperactivity disorder in people with generalized resistance to thyroid hormone   | thyroid                                   | No meta-analysis found, but claim refuted by the same group. |
| 1994<br>Wolraich               | Effects of diets high in sucrose or aspartame on the behavior and cognitive performance of children | sugar                                     | <i>71</i>                                                    |
| 1996<br>LaHoste                | Dopamine D4 receptor gene polymorphism is associated with attention deficit hyperactivity disorder  | D4 OR DRD4                                | <i>46, 47</i>                                                |
| 1996<br>Safer                  | Increased methylphenidate usage for attention deficit disorder in the 1990s                         | methylphenidate AND (prevalence OR usage) | No meta-analysis found                                       |
| 1998<br>Vaidya                 | Selective effects of methylphenidate in attention deficit hyperactivity disorder: a fMRI study      | fMRI OR MRI OR magnetic resonance         | No meta-analysis found                                       |
| 1999<br>Biederman              | Pharmacotherapy of attention-deficit/hyperactivity disorder reduces risk for substance use disorder | substance                                 | <i>81</i>                                                    |
| 1999<br>Dougherty              | Dopamine transporter density in patients with attention deficit hyperactivity disorder              | dopamine AND transporter                  | <i>59</i>                                                    |
| 1999<br>Gainetdinov            | Role of serotonin in the paradoxical calming effect of psychostimulants on hyperactivity            | medication                                | <i>63, 64</i>                                                |
| 1999<br>MTA group              | A 14-month randomized clinical trial of treatment strategies for ADHD                               | treatment OR treatments                   | <i>87</i>                                                    |
